# Supplementary material for: GSTZ1‐1 Deficiency Activates NRF2/IGF1R Axis in HCC via Accumulation of Oncometabolite Succinylacetone
Source: PubMed Central journal article supplement (PMC6669923; doi:10.15252/embj.2019101964), 2019-06-28
Supplement: EMBJ-38-e101964-s001.pdf [file EMBJ-38-e101964-s001.pdf]

# **GSTZ1-1 Deficiency Activates NRF2/IGF1R Axis in HCC via Accumulation of Oncometabolite Succinylacetone**

Fan Yang<sup>1,2,#</sup>, Jingjing Li<sup>1,#</sup>, Haijun Deng<sup>3,#</sup>, Yihao Wang<sup>4</sup>, Chong Lei<sup>1</sup>, Qiuji Wang<sup>1</sup>, Jin Xiang<sup>1</sup>, Li Liang<sup>1</sup>, Jie Xia<sup>1</sup>, Xuanming Pan<sup>1</sup>, Xiaosong Li<sup>2</sup>, Quanxin Long<sup>1</sup>, Lei Chang<sup>4</sup>, Ping Xu<sup>4</sup>, Ailong Huang<sup>1,\*</sup>, Kai Wang<sup>1,\*</sup>, Ni Tang<sup>1,\*</sup>

## **Table of Contents**

|                                     |    |
|-------------------------------------|----|
| Appendix Supplementary Methods..... | 2  |
| Appendix Figure S1.....             | 16 |
| Appendix Table S1.....              | 17 |
| Appendix Table S2.....              | 21 |
| Appendix Table S3.....              | 23 |

## **Appendix Supplementary Methods**

### **GEO Data Analysis**

GSE5975 dataset (Gene Expression Profiling of Hepatocellular Carcinoma) was downloaded from Gene Expression Omnibus (GEO) online. To identify the differentially expressed genes (DEGs) between paired HCC and para-carcinoma tissue in EpCAM positive and EpCAM negative groups, the differential expression analysis for the mRNA was performed, we used log<sub>2</sub> fold change greater than 2 as filtering for mRNA. To interpret biological implications of the DEGs, we carried out Kyoto Encyclopedia of Genes and Genomes (KEGG) metabolism pathway enrichment analysis, using the KOBAS3.0 program under a significance threshold of  $P < 0.05$  (<http://kobas.cbi.pku.edu.cn/index.php>).

### **TCGA Data Analysis**

Gene expression data of *GSTZ1* and *IGF1R* were obtained from The Cancer Genome Atlas (TCGA) Liver Hepatocellular Carcinoma (LIHC) dataset. To compare expression levels, we used the reads per kilobase per million mapped reads (RPKM) or RNA-sequencing (RNA-seq) by expectation maximization (RSEM), two RNA-seq normalization methods for describing transcript abundance of genes. In the box-scatterplot, boxes represent the two quartiles around the median. Kaplan-Meier survival analysis was performed by patient stratification of *GSTZ1* mRNA expression, high ( $> 25$  percentile) or low ( $\leq 25$  percentile).

### **Quantitative RT-PCR (qRT-PCR)**

Total RNA was extracted from cell lines and frozen tumor specimens using TRIzol™ reagent (Invitrogen, Carlsbad, CA, USA) and reverse transcribed into cDNA using a PrimeScript™ RT reagent kit (Takara, Shiga, Japan) according to the manufacturer's instructions.

Quantitative PCR was performed using iTaq™ Universal SYBR® Green Supermix and CFX

Connect Real-time PCR Detection System (Bio-Rad, Hercules, CA, USA). The constitution of the 10  $\mu$ l PCR reaction system was as follows: 2  $\mu$ l cDNA, 0.5  $\mu$ l forward primer (10 mM), 0.5  $\mu$ l reverse primer (10 mM), 5  $\mu$ l iTaq™ Universal SYBR® Green Supermix (Bio-Rad), and 2  $\mu$ l nuclease-free water. The reaction conditions were as follows: one cycle at 95°C for 30 seconds, followed by 35 cycles of amplification at 95°C for 10 seconds, then at 62°C for 30 seconds, and then at 72°C for 30 seconds. All samples were run in triplicate in each experiment. The objective CT values were normalized to that of actin, and relative gene expression was calculated using the  $\Delta\Delta$ CT method. The related primers were listed in Appendix Table S1.

### **Western Blotting (WB)**

Total protein was extracted from cells or tissues using RIPA Lysis Buffer (Strong) (Cwbiotech, Beijing, China) containing 1 mM phenylmethylsulfonyl fluoride (PMSF; Beyotime, Shanghai, China). Cytoplasmic and nuclear cellular proteins were extracted using a Nuclear and Cytoplasmic Protein Extraction Kit (Beyotime) according to the manufacturer's instructions. Protein concentrations were measured using a BCA protein assay Kit (Dingguo, Beijing, China). Protein samples were separated by 8-12.5% sodium dodecyl sulfate polyacrylamide gel electrophoresis (SDS-PAGE) at 90-120 V for 90-120 minutes, and then transferred to polyvinylidene difluoride (PVDF) membranes (Millipore, Boston, MA, USA). The membranes were blocked in 5% nonfat dry milk, or in bovine serum albumin in tris-buffered saline and Tween-20 (TBS-T; 10 mM Tris, 150 mM NaCl, and 0.1% Tween-20). Then, the membranes were incubated with following primary antibodies, diluted in bovine serum albumin, overnight at 4°C. Primary antibodies included: GSTZ1-1, IGF1R $\beta$ , phospho (Tyr1131) IGF1R $\beta$ , NQO1, TXNRD1, HO1, NRF2, Myc, Flag, AKT, phospho (Thr308) AKT, ERK, phospho (Thr202/Thr204) ERK, phospho (Ser136) BAD, phospho (Ser133) CREB, BCL2, caspase9,

and caspase3. The membranes were washed three times in TBS-T followed by incubation with secondary antibodies conjugated with horseradish peroxidase (HRP), for 1 hour at room temperature. The membranes were washed three additional times with TBS-T before enhanced chemiluminescence exposure. The expression of actin, tubulin, and laminB1 were used as normalization controls for total, cytoplasmic, and nuclear proteins, respectively. Antibody information was showed in Appendix Table S2.

### **Immunohistochemical (IHC) Assay**

Human or mouse liver tissue samples were fixed in 4% paraformaldehyde and embedded in paraffin according to standard procedures. The paraffin sections were incubated at 57°C for 2-4 hours, de-paraffinized in xylene for 20 minutes, and successively rehydrated in 100, 95, 85, and 75% ethanol, and in distilled water. Samples were boiled in citrate buffer and cooled down at room temperature for antigen retrieval. Samples were then incubated with 0.5% Triton X-100 for 20 minutes, followed by incubation with 3% hydrogen peroxide for 10 minutes. Samples were then washed with phosphate buffered saline (PBS) three times and blocked with goat serum for 1 hour at room temperature. Next, the serum was removed, and the samples were incubated with the following primary antibodies, diluted in PBS, overnight at 4°C. Primary antibodies included: GSTZ1-1, IGF1R $\beta$ , and phospho (Tyr1161) IGF1R $\beta$ . After rinsing three times in PBS, samples were incubated with reagent A of Elivision™ plus Polymer HRP (Mouse/Rabbit) IHC Kit (Maixin, Fuzhou, Fujian, China) for 20 minutes, followed by incubation with reagent B, and then with secondary antibody conjugated to HRP for 30 minutes. Signals indicating HRP activity were visualized using a DAB Kit (ZSGB-BIO, Beijing, China). The nuclei were counterstained with hematoxylin for 2 minutes and 30 seconds. After being rinsed, the samples were dehydrated, cleared in xylene, and mounted for microscopic examination. Antibody information was showed in Appendix Table S2.

## **Cell Culture**

The human hepatoma cell line HepG2 was obtained from the American Type Culture Collection (ATCC, Manassas, VA, USA). Huh7, SK-Hep1, MHCC-97H and HEK293T were obtained from the Cell Bank of the Chinese Academy of Sciences (Shanghai, China). Cells were maintained in Minimum Eagle medium (MEM for HepG2; Hyclone, Waltham, MA, USA) or Dulbecco's modified Eagle's medium (DMEM for all other cells; Hyclone) supplemented with 10% fetal bovine serum (FBS; Natocor, Villa Carlos Paz, Córdoba, Argentina) and 1% penicillin/streptomycin (Hyclone) in 5% CO<sub>2</sub> incubator at 37°C.

## **GSTZ1-1 overexpression in HCC cell lines**

Full-length *GSTZ1* cDNA (NM\_145870.2) was amplified from the plasmid pOTB7-GSTZ1-1 (FL09522; GeneCopoeia, Guangzhou, Guangdong, China) and inserted into the *BamH I* and *Hind III* sites of the shuttle vector pAdTrack-TO4 (kindly provided by Dr. T-C He, University of Chicago, USA). A recombinant adenovirus expressing GSTZ1-1 (AdGSTZ1) was generated using the AdEasy system (Luo et al, 2007). Huh7, SK-Hep1 and MHCC-97H cells, which endogenously express low levels of GSTZ1-1, were infected with AdGSTZ1 to establish the GSTZ1-1 overexpressing (GSTZ1-OE) cell model. An analogous adenovirus expressing green fluorescent protein (AdGFP) was used as control.

## **CRISPR-Cas9 mediated *GSTZ1* knockout in HepG2 cell line**

The *GSTZ1* targeting sequences (Appendix Table S1) were designed using the E-CRISP online tool (<http://www.e-crisp.org/E-CRISP/designcrispr.html>) and cloned into a lentiCRISPRv2 plasmid following the protocol established in the Zhang laboratory (<http://genome-engineering.org>). lentiCRISPRv2 was digested with *BsmB I*, ligated with the

annealed oligonucleotides, and transformed into DH10B competent bacteria. To package the lentivirus (Lenticrispr-GSTZ1-1), the recombinant plasmid was co-transfected into HEK293T cells with the packaging plasmids pGMD and psPAX2 using Lipofectamine 2000 (Invitrogen) per manufacturer's protocol. HepG2 cells were infected with the lentivirus and selected using puromycin to establish a stable *GSTZ1* knockout (*GSTZ1*-KO) cell line. Single-cell clones were then selected using a 96-well plate. For genotyping, clonal cell genomic DNA was extracted using a Genomic DNA Purification Kit (Genloci, Nanjing, Jiangsu, China) according to the manufacturer's instructions. The genomic region flanking the small guide RNA (sgRNA) target site was amplified by touchdown PCR, cloned into an pMD19-T TA cloning vector (Takara, Kyoto, Japan), and sequenced. The efficiency of *GSTZ1* knockout was confirmed by western blotting.

### **EdU Assay**

The proliferation capacity of HCC cells was assessed using a Cell-Light™ EdU Apollo®643 Cell Tracking Kit (RiboBio, Guangzhou, Guangdong, China), according to the manufacturer's instructions. Cells were seeded on coverslips in 6-well plates and grown to 50% confluence using three replicate wells for each group. *GSTZ1*-KO cells were treated with or without picropodophyllin (PPP; MCE, Monmouth, NJ, USA) (1.0 μM) for 24 hours. Cells were then incubated with Reagent A diluted at 1:1000 in culture medium for 2 hours. The cells were then washed using PBS, fixed in 4% paraformaldehyde for 30 minutes, and neutralized in 2 mg/ml glycine solution. Then cells were then incubated with a fluorescent dye (Apollo 643) for 30 minutes, and consequently wash with 0.5% Triton X-100 in PBS in the dark. Next, the nuclei were stained with 1 μg/ml DAPI (Roche, Mannheim, Germany) for 2 minutes and then washed in PBS. The coverslips were mounted on glass slides using Anti-fade Mounting Medium (Beyotime). Images were captured using a confocal microscope

(Leica, Buffalo Grove, IL, USA). The percentage of 5-ethynyl-2'-deoxyuridine (EdU)-positive cells was calculated for comparison.

### **Cell Growth Curve and Clone Formation Capacity**

Cells were seeded into 96-well plates (1500 cells/well for the GSTZ1-OE cell model and 3000 cells/well for the GSTZ1-KO cell model) using three replicate wells for each group. GSTZ1-KO cells were treated with or without PPP (0.5  $\mu$ M and 1.0  $\mu$ M) for 24 hours. The cells were incubated in CelCulture® CO<sub>2</sub> Incubator (ESCO, Changqi South Street, Singapore) for 120 hours, and the number of cells was counted automatically every 24 hours. Growth curves were plotted using GraphPad Prism 7 software.

Cells were seeded into 6-well plates (1500 cells/well for the GSTZ1-OE cell model and 3000 cells/well for the GSTZ1-KO cell model) using three replicate wells for each group, and were cultured in 5% CO<sub>2</sub> incubator at 37°C. After 7-10 days, the cells were fixed with 4% paraformaldehyde for 30 minutes and incubated with crystal violet. After rinsed with PBS three times, the clones were photographed and the number of clones was counted.

### **Dual-Luciferase Reporter Assay**

The promoter activity of antioxidative response element (ARE) and human IGF1R were detected using Dual-Luciferase Reporter System (Promega, Madison, WI, USA). The ARE reporter plasmid pGL3-ARE were kindly provided by Prof. Yiguo Zhang from Chongqing University. The IGF1R promoter was synthesized and cloned into a pGL3 plasmid by Tsingke Biological Technology (Beijing, China). The plasmids, pGL3-ARE (3  $\mu$ g) or pGL3-IGF1R (3  $\mu$ g) were co-transfected with RL-TK (0.3  $\mu$ g), into cells cultured in 6 cm dishes. After 24 hours, the cells were re-seeded into 24-well plate, three replicate wells for each group. 36 hours later, the cells in the 24-well plates were lysed with 1×Passive Lysis

Buffer for 15 minutes on a shaker at room temperature. The lysates were centrifuged, and the supernatants were collected. The activities of firefly and Renilla luciferases were detected according to the manufacturer's instruction. The relative luciferase activities, which represented the promoter activities, were calculated by normalizing the activity of firefly luciferase to that of corresponding Renilla luciferase.

### **Xenograft Implantation Model in vivo**

The male nude mice aged 4 weeks were obtained from Experimental Animal Center of Chongqing Medical University. MHCC-97H cells were infected with GSTZ1-1 expressing adenovirus (AdGSTZ1) or a control adenovirus expressing GFP (AdGFP) for 36 hours. Then the cells were digested by trypsin.  $1 \times 10^6$  cells were resuspended in 100  $\mu$ l of PBS and were inoculated subcutaneously into either side of the dorsal flank of the nude mouse. Each group included six mice. The tumor volumes were measured every three days once the tumors were formed, and calculated as length  $\times$  width  $\times$  height. After 4-5 weeks, the mice were sacrificed and the tumors were carefully removed and weighed. All animal procedures were performed according to protocols approved by the Rules for Animal Experiments published by the Chinese Government and approved by the Research Ethics Committee of Chongqing Medical University (reference number: 2017010).

### **Immunofluorescence (IF) Assay**

Cells, infected with AdGSTZ1 or AdGFP (control), were seeded on coverslips in 6-well plate. The cells were fixed with 4% paraformaldehyde for 25 minutes, and then permeabilized with 0.5% Triton X-100 for 15 minutes. After washed by 1 $\times$ PBS, the cells were blocked with goat serum for 1 hour, followed by overnight incubation at 4°C with anti-NRF2 primary antibody (1:300, Abcam, ab62352) in 1 $\times$ PBS. After that, the excess antibody was washed off with



1xPBS. Then the cells were incubated with secondary antibody, Alexa Fluor 647 H+L (1:500, Invitrogen, A-21244) for 2 hours at 37°C. After the cells were washed with 1xPBS in the dark, DAPI was stained for 3 minutes as a nuclei counterstain. The cells were washed and the coverslips were mounted on glass slides with Anti-fade Mounting Medium (Beyotime). Images were captured using a confocal microscope (Leica) with a 60x oil immersion objective.

### **Metabolites Detection Assay**

Wild type (WT) (n=6) and *Gstz1*<sup>-/-</sup> (n=6) adult mice (3 males and 3 females) were administered 2% (w/v) phenylalanine (Phe; Sigma, St. Louis, MO, USA) in drinking water for 1 week before sacrifice. Liver tissue (200 mg) was obtained from each mouse, and blood was washed off with physiological saline solution. The obtained liver tissues were placed into liquid nitrogen for 15 minutes and then stored at -80°C until analysis. Each 100 mg sample of liver tissue was extracted with cold acetonitrile/water (4:1, v/v) using a homogenizer. After centrifuging this mixture at 4°C and 15000 rpm for 10 minutes, the supernatant was freeze-dried at -52°C and dissolved in 100 µl acetonitrile/water (1:1, v/v). The concentrations of Phe/Tyr catabolites were detected using an Ultra High Performance Liquid Chromatography coupled to triple-quadrupole Mass Spectrometer (UHPLC-QqQ-MS).

### **Phenylalanine and Succinylacetone Treatment in vitro**

The phenylalanine (Phe; Sigma) or succinylacetone (SA; Sigma) was added to HepG2 cell culture medium in order to investigate whether the catabolites of tyrosine metabolism were activators of KEAP1/NRF2 pathway. Phe or SA was added into the cell culture medium at a final concentration of 2.0 mM or 200 µM, respectively. The treatment time of Phe or SA was

36 hours for ARE promoter activity detection and 48 hours for western blot and chromatin immunoprecipitation assay.

### **Analysis of KEAP1 Modification by Mass Spectrometry**

Analysis was performed using an LTQ-Orbitrap Velos (Thermo, Wilmington, DE, USA) mass spectrometer coupled with a nano-UPLC system (nanoAcquity Ultra Performance LC, Waters). Proteins were reduced with 5 mM dithiothreitol at 42°C for 30 minutes, and then alkylated with 10mM iodoacetamide in the dark at room temperature for 30 minutes. Proteins were digested with trypsin (10 ng/μl) at 37°C for 12h and resulting peptides were extracted from the gel with extracting buffer (50% acetonitrile (ACN), 5% formic acid (FA)). Peptides were separated on a self-packed capillary column (75 μm i.d. ×15cm, 3 μm C18 reverse-phase resin). Peptides were eluted using a 60 minutes nonlinear gradient: 4% B for 6 minutes, 4-10% B for 6 minutes, 10-24% B for 30 minutes, 24-34% B for 15 minutes, 34-80% B for 1 minute, 80% B for 2 minutes (Buffer A, 0.1% FA in ddH<sub>2</sub>O; Buffer B, 0.1% FA and 98% ACN in ddH<sub>2</sub>O; flow rate, ~300 nl/minute). The MS survey scans were acquired at a resolution of 30000, and target values of 1 000 000 ions over a mass range from 300 to 1600 m/z. Collision-induced dissociation was performed on the twenty most abundant ions per full MS scan using an isolation width of 2.0 Da. All fragmented precursor ions were actively excluded from repeated MS/MS analysis for 30 seconds. The raw files were searched with the Maxquant (v1.5.3.30) against the Swiss-Prot reviewed human database (2017-02). Full cleavage by trypsin was set including two miscleavages. Identifications satisfying the criteria, FDR≤1% at both peptide and protein levels, were considered.

### **RNA-sequencing (RNA-seq) Analysis**

For transcriptomics profiling, Huh7 cells were infected with AdGSTZ1 (n=3) or AdGFP (n=3)

for 36 hours. Total RNA was extracted using TRIzol™ reagent (Invitrogen), and quantified using a NanoDrop ND-1000 spectrophotometer (Thermo) and a Bioanalyzer 2200 (Agilent, Santa Clara, CA, USA). High quality RNA with an RNA Integrity Number (RIN) > 8.0 was used for the construction of cDNA library. RNA-seq was performed at the Shanghai Novel Bio-Pharm Technology Co., Ltd. In brief, strand-specific RNA-seq libraries were prepared using the Total RNA-seq (H/M/R) Library Prep Kit (Vazyme Biotech, Nanjing, Jiangsu, China), and were sequenced on an Ion Torrent Proton Sequencer using the Ion PI Sequencing 200 Kit (Life Technologies, Carlsbad, CA, USA). Raw reads in FASTQ format were subjected to quality control using FastQC (<http://www.bioinformatics.babraham.ac.uk/projects/fastqc/>). RNA-seq reads were aligned to the reference genome using Bowtie (<http://bowtie-bio.sourceforge.net>). Gene expression levels were expressed as RPKM (reads per kilobase per million), and DEGs were assessed with rSeq (<http://www-personal.umich.edu/~jianghui/rseq>). The RNA-seq data generated in this study were deposited in the GEO database (<http://www.ncbi.nlm.nih.gov/geo>) under accession number GSE117822.

### **Immunoprecipitation (IP) Assay**

The expression vector of human KEAP1 (AdKEAP1-3Flag) was made by subcloning PCR-amplified cDNA of KEAP1 into pSEB-3Flag vector (a gift from Dr. T-C He, University of Chicago, USA). The Flag-tagged KEAP1 was subcloned into the shuttle vector pAdTrack-TO4 and generated the adenoviral recombinant Ad-KEAP1-3Flag using the AdEasy system. An analogous adenovirus expressing only GFP (AdGFP) was used as control. The GSTZ1-KO HepG2 cells were seeded in two 100mm dishes and infected with AdKEAP1-3Flag, an adenovirus that expressing KEAP1 protein conjugated with Flag tag. 12 hours later, Phe was added into the cell culture medium at a final concentration of 2.0 mM.

After 48 hours, the cells were lysed for immunoprecipitation. The lysis buffer was composed of 10ml of Cell lysis buffer (50 mM Tris HCl, pH 7.4, with 150 mM NaCl, 1 mM EDTA, and 1% Triton X-100) and 1 tablet of protease inhibitor cocktail (Roche). Before use, the lysis buffer was pre-cooled on ice. Each dish of cells was rinsed twice with PBS and lysed with 1ml of lysis buffer for 30min on ice. Then the cells were scraped and the cell lysate was centrifuged at 12,000 g for 10 minutes at 4°C. The supernatant was transferred to a chilled test tube and kept on ice. The anti-Flag M2 affinity gel (Sigma, A2220) was thoroughly suspended. 40 µl of the gel was transferred to a test tube and centrifuged at 8000 g for 30 seconds at 4°C. The supernatant was discarded and the gel was washed with 0.5 ml of TBS (50 mM Tris HCl, with 150 mM NaCl, pH 7.4) twice. The gel was incubated with 1ml of cell lysate on a roller shaker at 4°C overnight. The next day, the mixture was centrifuged at 8000 g for 30 seconds at 4°C. The supernatant was removed and the gel was washed with 0.5 ml of TBS three times. Then the gel was boiled with 20 µl of 2× loading buffer for 5min and centrifuged at 8000 g for 30 seconds. The supernatants were collected and loading on SDS-PAGE for Electrophoresis. Then the gel was stained with coomassie blue and the bands indicating KEAP1 were excise for mass spectrometry to identify the modification of KEAP1.

### **KEAP1 Cysteine Target Validation**

The Cys to Ser mutant of KEAP1 (C23, C151, C319, C406, and C513) was constructed by site-directed mutagenesis, with WT KEAP1-3Flag plasmid as a template. The sequences of mutagenesis PCR primers were presented in Appendix Table S1. The authenticity of these constructs was confirmed by DNA sequencing. The WT KEAP1, C23S, C151S, C319S, C406S or C513S mutant KEAP1 was co-transfected with Myc-tagged NRF2 plasmid into HepG2 cells, respectively. Then the expression levels of KEAP1 and NRF2 proteins were detected by western blotting.

### **Co-Immunoprecipitation (Co-IP) Assay**

MHCC-97H cells were lysed with cell lysis buffer (Beyotime) containing a protease inhibitor cocktail (Roche) according to the manufacturer's instructions. Protein concentrations were measured using a BCA protein assay (Dingguo). Protein supernatants were incubated with Protein G Agarose Beads (Millipore) at 4°C for 1 hour, then centrifuged at 3000 rpm for 5 minutes. The supernatants were incubated with anti-NRF2 (1:20, Abcam, ab62352) or anti-SP1 (1:50, CST, #9389) antibodies overnight at 4°C, followed by incubation with Protein G Agarose Beads at 4°C for 2 hours. The beads were lightly washed twice in cell lysis buffer, followed by one wash in PBS containing 0.1% Tween-20. Immune complexes were resolved by SDS-PAGE on 10% gels, transferred to PVDF membranes, and then subjected to immunoblot analysis using the indicated antibodies.

### **Chromatin Immunoprecipitation (ChIP) Assay**

MHCC-97H cells treated with or without Brusatol (Bru; Meilunbio, Dalian, Liaoning, China), tertiary butylhydroquinone (tBHQ; Sigma), Phe (Sigma) or SA (Sigma) were incubated with 1% formaldehyde for 10 minutes at 37°C, followed by termination of the cross-linking reaction in 0.125 M glycine solution for 5 minutes at 37°C. Cells were lysed with cell lysis buffer for western blotting and immunoprecipitation (Beyotime) containing 1% protease inhibitor cocktail (Roche). Precipitates were resuspended after adding ChIP Lysis Buffer (150 mM NaCl, 50 mM HEPES, 1 mM EDTA, 1% Triton X-100, 0.1% SDS, 0.1% sodium deoxycholate, pH=7.5) containing cocktail (Roche) and lysed for 30 minutes on ice. Ultrasonic pyrolysis genome using EpiSonic Multi-Functional Bioprocessor 1000 (Epigentek, Farmingdale, NY, USA) was performed to obtain 200-1000 bp DNA fragments. Supernatants were incubated with Protein G Agarose Beads (Millipore) at 4°C for 1 hour, and then centrifuged at 3000 rpm

for 1 minute. Each of supernatant was divided into four parts for Input control and incubation with antibodies. The supernatants were incubated with IgG as negative control, with anti-Histone H3 (4ug for 25 µg of chromatin, Abcam, ab12079) as positive control, or with anti-SP1 antibody (1:100, CST, #9389) overnight at 4°C, followed by incubation with Protein G Agarose Beads at 4°C for 2 hours. The beads were gently washed for 5 minutes each time in ChIP Lysis Buffer (containing 1% cocktail), high salt wash buffer (500 mM NaCl, 50 mM HEPES, 1 mM EDTA, 1% Triton X-100, 0.1% SDS, 0.1% sodium deoxycholate, pH=7.5), ChIP Lysis Buffer (containing 1% cocktail), and hiTE Buffer (50 mM Tris/HCl, 10 mM EDTA, pH=7.5). The precipitates were resuspended for 10 minutes in ChIP Elution Buffer (50 mM Tris/HCl, 10 mM EDTA, 1% SDS). Following elution, immunoprecipitated DNA was extracted and subjected to PCR analysis. The 20 µl PCR reaction system was assembled as follows: 2 µl DNA, 0.5 µl forward primer (20 µM), 0.5 µl reverse primer (20 µM), 10 µl 2×Taq PCR Green Mix (Dingguo, Beijing, China), and 7 µl nuclease-free water. The reaction conditions were: one cycle at 96°C for 2 minutes, followed by 35 cycles of amplification at 96°C for 20 seconds, then at 55°C for 30 seconds, and then at 72°C for 30 seconds. All samples were run in triplicate in each experiment. The sequences of the primers for human IGF1R promoter were showed in Appendix Table S1.

### **Flow Cytometry-Based Detection of Apoptosis**

The apoptosis of HCC cells was evaluated by flow cytometry using an Annexin V-Fluorescein isothiocyanate/propidium iodide (V-FITC/PI) kit (Beyotime) according to the manufacturer's instructions. Cells were seeded into 6-well plates with three replicate wells for each group. PPP treatment was introduced after the cells were adhered. The cells were then collected, rinsed in pro-cooling PBS twice, and then centrifuged at 1000 g for 5 minutes. The supernatant was removed, and the cells were resuspended after in 100 µl binding buffer.

Next, cells were stained with 5  $\mu$ l Annexin V-FITC and 10  $\mu$ l PI for 15 minutes in the dark, followed by the addition of 400  $\mu$ l binding buffer. Cells in early stages of apoptosis were stained with Annexin V+/PI-. The rate of apoptosis was analyzed by FACSCalibur™ Flow Cytometer (BD Biosciences, Franklin, NJ, USA).

### **Enzyme-Linked Immunosorbent Assay (ELISA)**

Whole blood samples, obtained from the mouse orbit, were incubated at 37°C for 2 hours, followed by centrifugation at 1000 g for 20 minutes. The separated sera were collected. Serum levels of alanine aminotransferase (ALT) and alpha-fetoprotein (AFP) were assessed using a Mouse ALT and AFP ELISA Kit (KaLang, Shanghai, China) according to the manufacturer's protocol. Serum samples or standards (50  $\mu$ l/well) were added to a coated 96-well ELISA microplate. After incubation at 37°C for 30 minutes, the wells were washed five times with 1X Wash Buffer. Then, 50  $\mu$ l anti-ALT or AFP antibody conjugated with HRP was added to the wells and allowed to incubate at 37°C for 30 minutes. After washing five times with 1X Wash Buffer, TMB Substrate (50  $\mu$ l/well) was added into the wells with and allowed to incubate for 10 minutes at 37°C in the dark. Next, stop buffer (50  $\mu$ l/well) was added into the wells for induction of the blue to yellow color change. The optical density values (ODs) at 450 nm were recorded with Synergy™ H1 Hybrid multimode microplate reader (BioTek, Winooski, VT, USA). The standard curve was plotted using GraphPad prism 7 software, and the ALT and AFP values were calculated using the standard curve equation.

Luo J, Deng ZL, Luo X, Tang N, Song WX, Chen J, et al. A protocol for rapid generation of recombinant adenoviruses using the AdEasy system. *Nat Protoc* 2007; 2: 1236-1247.

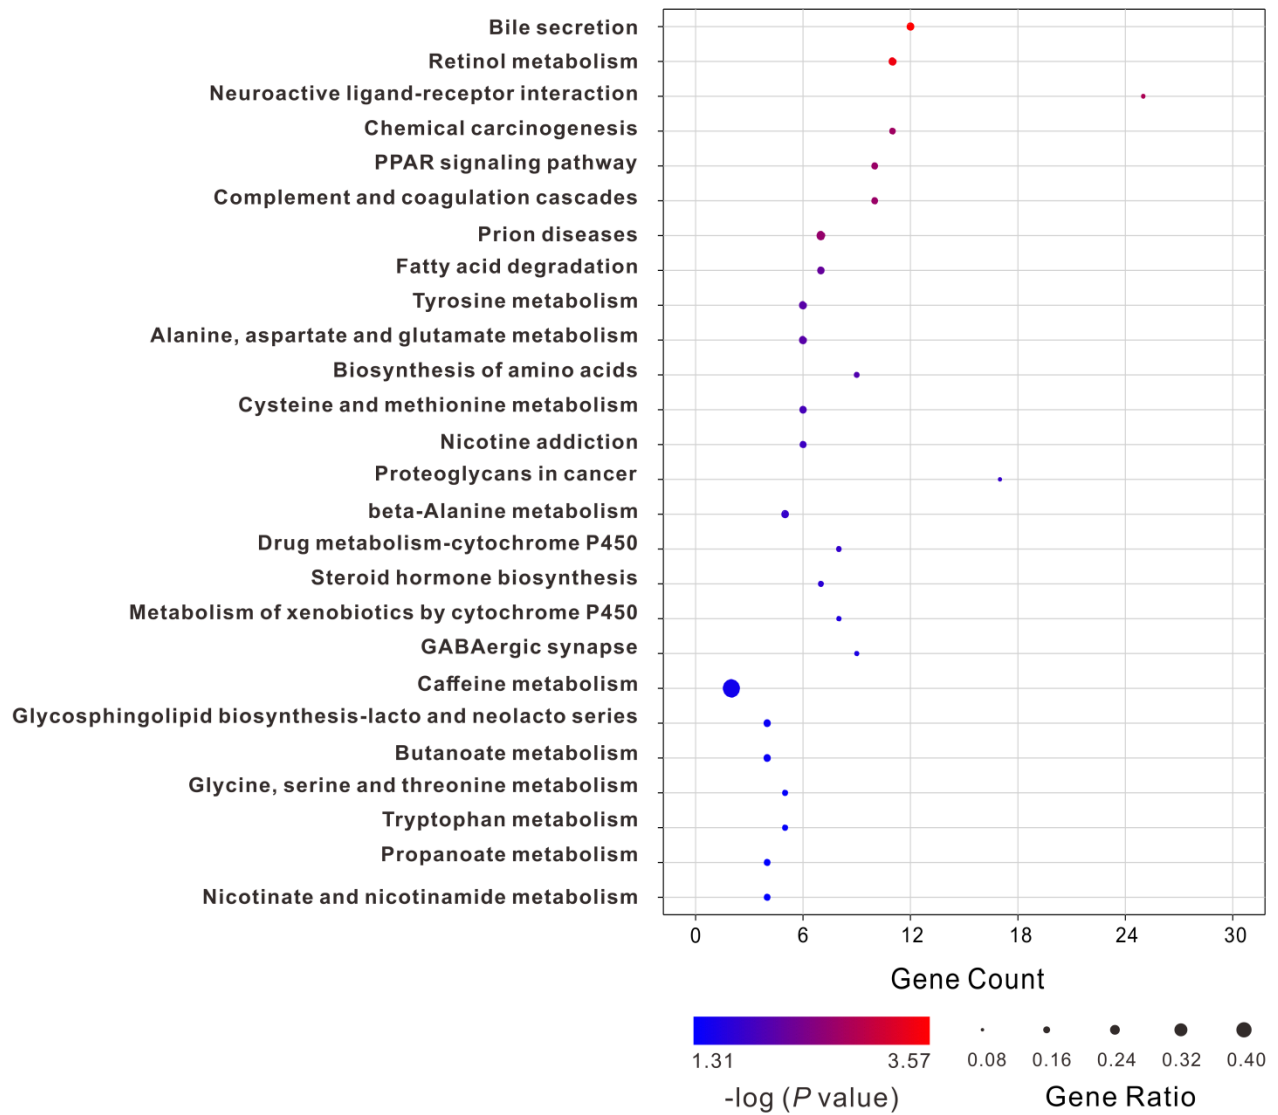

**Appendix Figure S1.** Significantly enriched Kyoto Encyclopedia of Genes and Genomes (KEGG) pathways associated with differentially expressed genes (DEGs). The dot size indicated the ratio of DEGs which participate in pathways, and the gradient colors from red to blue indicated ascending enrichment  $P$ -values.



**Appendix Table S1. Primer sequences used in the study**

| <b>Name</b>                            | <b>Sequences</b>                                                    |
|----------------------------------------|---------------------------------------------------------------------|
| <b>Primers for quantitative RT-PCR</b> |                                                                     |
| ACTIN                                  | Forward: AGGCCAACCGCGAGAAGATGACC<br>Reverse: GAAGTCCAGGGCGACGTAGCAC |
| GSTZ1                                  | Forward: CAGAGCACAGCGGGCATATA<br>Reverse: GCTCAGTGGGTGTATCTGGC      |
| IGF1R                                  | Forward: ATGACATTCTGGGCCAGTG<br>Reverse: TAGCTTGGCCCCTCCATACT       |
| NQO1                                   | Forward: CCAGCAGACGCCCCGAAT<br>Reverse: CCAAGTGATGGCCCACAGA         |
| MRP2                                   | Forward: ACGGGCACATCACCATCAAG<br>Reverse: CTCCAGGCAGCATTTCCAAG      |
| GCLM                                   | Forward: GACAAAACACAGTTGGAACAGC<br>Reverse: CAGTCAAATCTGGTGGCATC    |
| TXNRD1                                 | Forward: CCCTTTCTTTCATTCCCTCTCTG<br>Reverse: ATTCACCCACCTTTTGTCCCT  |
| G6PD                                   | Forward: TGACCTGGCCAAGAAGAAGA<br>Reverse: CAAAGAAGTCCTCCAGCTTG      |
| HO1                                    | Forward: AACTTTCAGAAGGGCCAGGT<br>Reverse: CTGGGCTCTCCTTGTGTC        |
| IRS1                                   | Forward: AAGTGGCGGCACAAGTCG<br>Reverse: ACGTCACCGTAGCTCAAGTCC       |
| IRS2                                   | Forward: TGTACCGTCTGTGCCTGTCTG<br>Reverse: TGGTCTCGTGGATGTTCTGC     |

PIK3CA Forward: TGCTGTTTCGGTGCTTGA  
Reverse: CTCTGGCTAACTGTTTTATTGTGC

PDPK1 Forward: CTGTATGACGCCGTGCCC  
Reverse: CCAAGGATTTTCCCAAACCTGA

BRAF Forward: GGCACGGAGCAACCCCA  
Reverse: CAGGAAATATCAGTGTCCCAACC

RPS6KA1 Forward: GATCGGCAGTGGGAAGTTTAC  
Reverse: TGGGCTTGGAGCTGTTGAGT

BCL2 Forward: GGTGAACTGGGGGAGGATTG  
Reverse: GGCCAAACTGAGCAGAGTCT

BCLG Forward: CCATTGCCAACCGAGTAGC  
Reverse: GGCCCATCAAAGCCTTATCT

BAX Forward: CATGAAGACAGGGGCCCTTT  
Reverse: GGAAAAAGACCTCTCGGGGG

CASP9 Forward: TGCTGCGTGGTGGTCATT  
Reverse: CTGGCTCGGGGTTACTGC

CASP7 Forward: GTCCTCGTTTGTACCGTCCC  
Reverse: TCGGCATCTTTGTCTGTTCC

NFKB1 Forward: GATTTTCGTTTCCGTTATGTATGTG  
Reverse: TGTCCCTGGGTCCAGCAGTT

BIRC3 Forward: CTTTTGCTGTGATGGTGGACTC  
Reverse: CTCCTGGGCTGTCTGATGTG

---

### Primers for GSTZ1 sgRNA

GSTZ1 sg1 Forward: CACCGCACGCTGGCCCTCTTCTTT  
Reverse: AAACAAAGAAGAGGGCCAGCGTGC

GSTZ1 sg2 Forward: CACCGCTGGATGCCACCAGCGATG

Reverse: AAACCATCGCTGGTGGCATCCAGC

GSTZ1 sg3 Forward: CACCGCCCAGAACGCCATCACTTG

Reverse: AAACCAAGTGATGGCGTTCTGGGC

---

### Primers for TA-clone

GSTZ1-seq1 and 2 Forward: TGGATGGCTGACTAGGGTAG

Reverse: GCTGCTCTGGTTAAAGGCA

GSTZ1-seq3 Forward: GGACCATGCAAGGGAGAA

Reverse: TTAAGACGGTTTAGTGGGAGTG

---

### Primers for wild type and mutant KEAP1

KEAP1 Forward: CGGGGTACCATGGGCCAGCCAGATCCCAGGCCTAGC

Reverse: CCCAAGCTTTTAAATCTTATCGTCGTCATCCT

KEAP1 Forward: TGCCCCTGCAGTCACAGAGCCCTGAGGG

C23S Reverse: CCCTCAGGGCTCTGTGACTGCAGGGGCA

KEAP1 Forward: CGCAGGTGATGCCAGCCGGGCGCC

C319S Reverse: GGCGCCCGGCTGGGCATCACCTGCG

KEAP1 Forward: ATCAGTGGTCGCCCAGCGCCCCATGA

C406S Reverse: TCATGGGGGCGCTGGGCGACCACTGAT

KEAP1 Forward: AGCGGGGCAGGCGTCAGCGTCCTGCAC

C513S Reverse: GTGCAGGACGCTGACGCCTGCCCCGCT

GSTZ1 Forward: CGCGGATCCACCATGGGCCAGGCGGGGAAGCCCATCCTCTAT

Reverse: CCCAAGCTTCTAGGCCCTCAGCTCAGTGGGTGT

---

### Primers for IGF1R promoter construct

IGF1R promoter Forward: CTAGCTAGCCACCAGGCGAACTCGAGA

Reverse: CCGCTCGAGGCGAAGGAAACAATACTCCGAA

---

---

### Primers for ChIP in the IGF1R promoter

IGF1R promoter      Forward: GGCTGGGGCTCTTGTTTAC

Reverse: TCGAGTTCGCCTGGTGC

---

### Primers for IGF1R shRNA

IGF1R sh1      Forward: TCGGGTAGTTGTACTCATTGTTCAAGAGACAATGAGTACAACCTACCGCTTTTTTC

Reverse: TCGAGAAAAAGCGGTAGTTGTACTCATTGTCTCTTGAACAATGAGTACAACCTACCGCA

IGF1R sh2      Forward: TGGCCAGAAATGGAGAATAATCAAGAGATTATTCTCCATTTCTGGCCTTTTTTC

Reverse: TCGAGAAAAAGGCCAGAAATGGAGAATAATCTCTTGAATTATTCTCCATTTCTGGCCA

IGF1R sh3      Forward: TGGATATTGGGCTTTACAACCTCAAGAGAGTTGTAAAGCCCAATATCCTTTTTTC

Reverse: TCGAGAAAAAGGATATTGGGCTTTACAACCTCTCTTGAAGTTGTAAAGCCCAATATCCA

---

**Appendix Table S2. The characteristics of antibodies**

| <b>Protein</b>           | <b>Application</b> | <b>Origin</b>                            | <b>Dilution</b> |
|--------------------------|--------------------|------------------------------------------|-----------------|
| GSTZ1-1                  | WB&IHC             | GTX106109; GeneTex, Irvine, CA, USA      | 1000&100        |
| IGF1R $\beta$            | WB                 | #9750; CST, Beverly, MA, USA             | 1000            |
| pIGF1R $\beta$ (Tyr1131) | WB                 | #3021; CST, Beverly, MA, USA             | 1000            |
| NQO1                     | WB                 | BS6833; Bioworld, Louis, MN, USA         | 1000            |
| TXNRD1                   | WB                 | GTX108727; GeneTex, Irvine, CA, USA      | 1000            |
| HO1                      | WB                 | GTX101147; GeneTex, Irvine, CA, USA      | 1000            |
| NRF2                     | WB&IF&Co-IP        | ab62352; Abcam, Cambridge, MA, USA       | 1000&300&20     |
| Myc                      | WB                 | #2278; CST, Beverly, MA, USA             | 1000            |
| Flag                     | WB                 | MA1-91878; Thermo, Waltham, MA, USA      | 500             |
| AKT                      | WB                 | BS1810; Bioworld, Louis, MN, USA         | 1000            |
| pAKT (Thr308)            | WB                 | BS4009; Bioworld, Louis, MN, USA         | 1000            |
| ERK                      | WB                 | #4695; CST, Beverly, MA, USA             | 1000            |
| pERK (Thr202/204)        | WB                 | #4370; CST, Beverly, MA, USA             | 2000            |
| pBAD (Ser136)            | WB                 | #4366; CST, Beverly, MA, USA             | 1000            |
| pCREB (Ser133)           | WB                 | RLP0075; Ruiying, Suzhou, Jiangsu, China | 1000            |
| BCL2                     | WB                 | RLM3041; Ruiying, Suzhou, Jiangsu, China | 1000            |
| Caspase9                 | WB                 | RLM3077; Ruiying, Suzhou, Jiangsu, China | 1000            |
| Caspase3                 | WB                 | #9665; CST, Beverly, MA, USA             | 1000            |
| actin                    | WB                 | BL005B; Biosharp, Hefei, Anhui, China    | 1000            |
| tubulin                  | WB                 | 66240-1-Ig; Proteintech, Suite, IL, USA  | 10000           |
| laminB1                  | WB                 | AP6001; Bioworld, Louis, MN, USA         | 5000            |
| Goat anti-Rabbit IgG     | WB                 | ab6721; Abcam, Cambridge, MA, USA        | 10000           |
| Goat anti-Mouse IgG      | WB                 | ab6789; Abcam, Cambridge, MA, USA        | 5000            |

|                          |            |                                        |              |
|--------------------------|------------|----------------------------------------|--------------|
| IGF1R $\beta$            | IHC        | #3027; CST, Beverly, MA, USA           | 100          |
| pIGF1R $\beta$ (Tyr1161) | IHC        | ab39398; Abcam, Cambridge, MA, USA     | 50           |
| Alexa Fluor 647 H+L      | IF         | A-21244; Invitrogen, Carlsbad, CA, USA | 500          |
| Flag M2 Affinity Gel     | IP         | A2220; Sigma, St. Louis, MO, USA       | 40 $\mu$ l   |
| SP1                      | Co-IP&ChIP | #9389; CST, Beverly, MA, USA           | 50&100       |
| Histone H3               | ChIP       | ab12079; Abcam, Cambridge, MA, USA     | 4:25 $\mu$ g |

---

### Appendix Table S3. Other resources table

---

#### Cell Lines

|           |                   |
|-----------|-------------------|
| HEK293T   | Lab stock         |
| Hep3B     | Lab stock         |
| HepG2     | ATCC, Cat#HB-8065 |
| Huh7      | Lab stock         |
| MHCC97H   | Lab stock         |
| MIHA      | Lab stock         |
| PLC/PRF/5 | Lab stock         |
| SK-Hep1   | Lab stock         |

---

#### Recombinant DNA

|                |                                                                                                                            |
|----------------|----------------------------------------------------------------------------------------------------------------------------|
| LentiCrisprv2  | Lab stock                                                                                                                  |
| pAdTrack-TO4   | Dr. T-C He, University of Chicago, USA                                                                                     |
| pcDNA-5Myc     | Prof. Wei LV, Shanghai Institute of Nutrition and Health, China                                                            |
| pGL3-ARE       | Prof. Yiguo Zhang, Chongqing University, China                                                                             |
| pGL3-IGFIR     | Cat#A80241/Y0009053-1, Tsingke Biological Technology, Beijing, China                                                       |
| promoter       |                                                                                                                            |
| pLL3.7         | kindly provided by Prof. Bing Sun, Shanghai Institute of Biochemistry and Cell Biology, Chinese Academy of Sciences, China |
| pLL3.7-shIGFIR | This study                                                                                                                 |
| pOTB7-GSTZ1    | GeneCopoeia, Cat#FL09522                                                                                                   |
| pRL-TK         | Lab stock                                                                                                                  |
| pSEB-3Flag     | Dr. T-C He, University of Chicago, USA                                                                                     |

---

---

### Bacterial and Virus Strains

|                                    |            |
|------------------------------------|------------|
| AdEasy-BJ5183 E. coli              | Lab stock  |
| AdGSTZ1                            | This study |
| AdKeap1-3Flag                      | This study |
| DH10B Chemically Competent E. coli | Lab stock  |
| Lenticrispr-GSTZ1                  | This study |

---

### Animal Strains

|                                    |                                                            |
|------------------------------------|------------------------------------------------------------|
| BALB/c nude mice (male)            | Experimental Animal Center of Chongqing Medical University |
| 129-GSTZ1 <sup>tm1Jmfc</sup> /Cnbc | EMMA: CNB-CSIC, Cat#B001301; RRID: IMSR_EM:04481           |

---

### Chemicals and Recombinant Proteins

|                                          |                                            |
|------------------------------------------|--------------------------------------------|
| NTBC                                     | N843653, Macklin, Shanghai, China          |
| 2×Taq PCR Green Mix                      | PER 007, Dingguo, Beijing, China           |
| Anti-fade Mounting Medium                | P0126, Beyotime, Shanghai, China           |
| Brusatol (Bru)                           | MB7292, Meilunbio, Dalian, Liaoning, China |
| Carbon tetrachloride (CCl <sub>4</sub> ) | C805332, Macklin, Shanghai, China          |
| Cell lysis buffer for Western and IP     | P0013, Beyotime, Shanghai, China           |
| DAPI                                     | 10236276001, Roche, Mannheim, Germany      |
| Diethylnitrosamine (DEN)                 | N0756, Sigma, St. Louis, MO, USA           |
| DMEM                                     | SH30243.01, Hyclone, Waltham, MA, USA      |
| Lipofectamine 2000                       | 11668019, Invitrogen, Carlsbad, CA, USA    |
| MEM                                      | SH30024.01, Hyclone, Waltham, MA, USA      |
| <i>N</i> -acetylcysteine (NAC)           | Cat# S0077, Beyotime, Shanghai, China      |
| Opti-MEM                                 | 31985070, Gibco, Carlsbad, CA, USA         |



|                                   |                                               |
|-----------------------------------|-----------------------------------------------|
| Penicillin-Streptomycin Solution  | SV30010, Hyclone, Waltham, MA, USA            |
| Phenylalanine (Phe)               | P5482, Sigma, St. Louis, MO, USA              |
| Picropodophyllin (PPP)            | 477-47-4, MCE, Monmouth, NJ, USA              |
| Polybrene                         | 40804ES76, Yeasen, Shanghai, China            |
| Recombinant Human IGF-I           | P5502, Beyotime, Shanghai, China              |
| RIPA Lysis Buffer (Strong)        | CW2333S, Cwbiotech, Beijing, China            |
| Succinylacetone (SA)              | D1415, Sigma, St. Louis, MO, USA              |
| Suero fetal bovino esteril        | Natocor, Villa Carlos Paz, Córdoba, Argentina |
| Tertiary butylhydroquinone (tBHQ) | 112941, Sigma, St. Louis, MO, USA             |
| TRizol™ Reagent                   | 15596026, Invitrogen, Carlsbad, CA, USA       |
| Trypsin                           | 15050057, Gibco, Carlsbad, CA, USA            |
| Trypsin-EDTA                      | 25200072, Gibco, Carlsbad, CA, USA            |

---

### Critical Commercial Assays

|                                               |                                                |
|-----------------------------------------------|------------------------------------------------|
| Annexin V-FITC Apoptosis Detection Kit        | C1062L, Beyotime, Shanghai, China              |
| BCA protein assay Kit                         | BCA02, Dingguo, Beijing, China                 |
| Cell-Light™ EdU Apollo®643 Kit                | C10310-2, RiboBio, Guangzhou, Guangdong, China |
| EDTA-free Protease Inhibitor Cocktail Tablets | 04693132001, Roche, Mannheim, Germany          |
| DAB kit                                       | ZLI-9019, ZSGB-BIO, Beijing, China             |
| Dual-Luciferase® Reporter Assay System        | E1910, Promega, Madison, WI, USA               |
| Elivision™ plus Polymer HRP IHC Kit           | KIT-9901, Maxim, Fuzhou, Fujian, China         |
| Genomic DNA Purification Kit                  | GP0155, Genloci, Nanjing, Jiangsu, China       |
| iTaq™ Universal SYBR® Green Supermix          | 1725121, Bio-Rad, Hercules, CA, USA            |
| Mouse AFP ELISA Kit                           | KL-AFP-Mu, KaLang, Shanghai, China             |

|                                                |                                    |
|------------------------------------------------|------------------------------------|
| Mouse ALT ELISA Kit                            | KL-ALT-Mu, KaLang, Shanghai, China |
| Nuclear and Cytoplasmic Protein Extraction Kit | P0028, Beyotime, Shanghai, China   |
| PrimeScript® RT reagent Kit                    | RR047A, Takara, Shiga, Japan       |

---

### **Softwares**

|                      |                                                                                                                                        |
|----------------------|----------------------------------------------------------------------------------------------------------------------------------------|
| GraphPad Prism 7.0   | GraphPad Software, <a href="https://www.graphpad.com/scientific-software/prism">https://www.graphpad.com/scientific-software/prism</a> |
| Image J 2.0          | Rawak Software, <a href="https://imagej.nih.gov/ij/">https://imagej.nih.gov/ij/</a>                                                    |
| Image-pro plus 7.0   | Media Cybernetics, <a href="http://www.mediacy.com/imageproplus">http://www.mediacy.com/imageproplus</a>                               |
| Maxquant (v1.5.3.30) | <a href="http://www.maxquant.org/">http://www.maxquant.org/</a>                                                                        |

---
